# Supplementary material for: Student Learning Dispositions: Multidimensional Profiles Highlight Important Differences among Undergraduate STEM Honors Thesis Writers
Source: Atypon-hosted journal article supplement (doi:10.1187/cbe.18-07-0141), 2019-05-31
Supplement: combinedsupmats.pdf [file combinedsupmats.pdf]

# Supplemental Material

*CBE—Life Sciences Education*

Dowd *et al.*

## Student Survey

We are interested in enhancing the learning experience for students who undertake a thesis. This survey has several sections and asks about your motivations and goals, views about knowledge, and your self-appraisals of your writing skills.

Please enter your full name here. We only require your name so that we can initially identify you as a participant. Once surveys are collected, [researcher] will immediately remove your name and replace it with a unique study subject number.

### *Part 1 of 6*

1. We recognize that you may have multiple motivations for undertaking a thesis. We are interested in the relative importance to you of different reasons.

Please distribute 100 points to reflect the relative importance to you of each of the following [5] reasons that you might have undertaken a thesis. You could assign all 100 points to one reason or distribute more points to some than other reasons; but your total across all [5] reasons must add up to 100.

- a. To distinguish myself from other students
  - b. To demonstrate mastery of a topic [mastery]
  - c. To learn how to, or gain experience with, generating and applying knowledge [mastery]
  - d. To demonstrate my abilities and competencies to graduate or profession school admissions committees or prospective employers
  - e. To fulfill a graduation requirement
2. In addition to the above ratings, please describe in your own words your reason for undertaking a thesis.

### *Part 2 of 6*

3. At this point in time, to what extent do you feel you can...  
(Response scale: Not at all, Limited, Moderate, Large, Superior)
  - a. construct a good opening sentence quickly?
  - b. come up with an unusual opening paragraph to capture readers' interest?
  - c. write a brief but informative overview that will prepare readers for the main thesis of your paper?
  - d. use your first attempt at writing to refine your ideas on a topic?
  - e. meet the writing standards of an evaluator who is very demanding?
  - f. come up with memorable examples quickly to illustrate an important point?
  - g. rewrite your wordy or confusing sentences clearly?
  - h. use words to create a vivid picture when you need to make a subtle or an abstract idea more imaginable?

- i. locate and use appropriate reference sources when you need to document an important point?
- j. write very effective transitional sentences from one idea to another?
- k. find ways to overcome the problem when you get stuck writing a paper?
- l. find and correct all your grammatical errors when you have written a long or complex paper?
- m. revise a first draft of any paper so that it is shorter and better organized?
- n. find other people who will give critical feedback on early drafts of your paper?
- o. come up with a short, informative title when my paper is written on a complicated topic?

*Part 3 of 6*

4. At this point in time, to what extent do you feel you can...  
(Response scale: Not at all, Limited, Moderate, Large, Superior)
- a. identify unanswered questions in the literature that are relevant to your research?
  - b. make use of primary scientific research literature in your field?
  - c. identify a specific research question for investigation?
  - d. describe the main goals of your research project?
  - e. generate a hypothesis related to your research question?
  - f. design an experiment or method to test your hypothesis?
  - g. observe and collect data?
  - h. analyze your data?
  - i. interpret your results in light of your proposed hypothesis?
  - j. discuss alternative explanations for your results?
  - k. explain inconsistencies in your results?
  - l. describe limitations in the design of your study?
  - m. explain the broader significance of your research?
  - n. suggest additional experiments or future avenues for research in your field?
  - o. design effective and appropriate tables and figures to present your results?
  - p. explain terms and concepts that are specific to your research to a non-specialist (but still scientific) audience?
  - q. orally communicate your research to a non-specialist audience?
  - r. write a thesis or other major research paper in your discipline?
  - s. write an academic paper for publication?
  - t. think independently about your research?

*Part 4 of 6*

5. Please indicate the extent to which you agree or disagree with the following statements.  
(Response scale: Strongly disagree, Disagree, Neutral, Agree, Strongly agree)
- a. Reasoning skills used to understand this discipline can be helpful to me in my everyday life. [real world]
  - b. Truth is unchanging in this subject. [certainty & simplicity]

- c. This subject has little relation to what I experience in the real world. [real world]
- d. To understand this discipline, I sometimes think about my personal experiences and relate them to the topic being analyzed. [real world]
- e. In this subject, most work has only one right answer. [certainty & simplicity]
- f. Sometimes you just have to accept answers from the experts in this field, even if you don't understand them. [authority as source]
- g. If you read something in a textbook for this subject, you can be sure it's true. [authority as source]
- h. All professors in this field would probably come up with the same answers to questions in this field. [certainty & simplicity]
- i. If my personal experience conflicts with ideas in the textbook, the book is probably right. [authority as source]
- j. Learning this discipline changes my ideas about how the world works. [real world]
- k. [not used for analysis] We use this question to discard the survey of people who are not reading the statements. Please select agree, option 4 (not strongly agree), to preserve your answers.
- l. I am most confident that I know something when I know what the experts think. [authority as source]
- m. In this subject, it is good to question the ideas presented. [certainty & simplicity]
- n. Answers to questions in this field change as experts gather more information. [certainty & simplicity]
- o. All experts in this field understand the field in the same way. [certainty & simplicity]
- p. Principles in this field are unchanging. [certainty & simplicity]
- q. Most of what is true in this subject is already known. [certainty & simplicity]

*Part 5 of 6*

- 6. Each item consists of a pair of contrasting statements. These statements describe two individuals, Robin and Chris. After each pair of statements, please indicate whether (1) only one view can be correct, (2) both views can be correct, but one is more correct than the other, or (3) both views can be correct, and neither is more correct than the other.
  - a. Robin says warm summer days are the nicest. Chris says cool autumn days are nicest.
  - b. Robin says the stew is spicy. Chris says the stew is not spicy at all.
  - c. Robin thinks weddings should be held in the afternoon. Chris thinks weddings should be held in the evening.
  - d. Robin thinks the first book they both read is better. Chris thinks the second book they both read is better.
  - e. Robin thinks people should take responsibility for themselves. Chris thinks people should work together to take care of each other.
  - f. Robin thinks lying is wrong. Chris thinks lying is permissible in certain situations.
  - g. Robin thinks the government should limit the number of children families are allowed to have to keep the population from getting too big. Chris thinks families should have as many children as they choose.
  - h. Robin has one view of why criminals keep going back to crime. Chris has a different view of why criminals keep going back to crime.

- i. Robin thinks one book's explanation of why the Crimean wars began is right. Chris thinks another book's explanation of why the Crimean wars began is right.
- j. Robin agrees with one book's explanation of how children learn language. Chris agrees with another book's explanation of how children learn language.
- k. Robin believes one book's explanation of what atoms are made up of. Chris believes another book's explanation of what atoms are made up of.
- l. Robin believes one mathematician's proof of formula is right. Chris believes another mathematician's proof of formula is right.
- m. Robin believes one book's explanation of how the brain works. Chris believes another book's explanation of how the brain works.

*Part 6 of 6*

- 7. To evaluate knowledge claims and explanations, I rely on...
  - a. my experiences and knowledge.
  - b. mostly my experiences and knowledge, though also my core beliefs and values.
  - c. equal parts of experience and knowledge and core beliefs and values.
  - d. mostly my core beliefs and values, though also my experiences and knowledge.
  - e. my core beliefs and values.
  
- 8. To evaluate knowledge claims and explanations, I must evaluate the credibility of...
  - a. the source of the claim.
  - b. mostly the source of the claim, though also the argument and evidence presented.
  - c. equal parts of the source of the claim and the argument and evidence presented.
  - d. mostly the argument and evidence presented, though also the source of the claim.
  - e. the argument and evidence presented.
  
- 9. Overall, please indicate which perspective best reflects your view.
  - a. Knowledge is discovered and consists of facts that have been determined to be true and about which we can be certain. Knowledge claims are verifiable as right or wrong on the basis of objective evidence and standards.
  - b. Knowledge is socially constructed and uncertain and consists of opinions and interpretations that are subjective. People are entitled to their own opinion, and thus there are no bases on which to judge the merits of knowledge claims.
  - c. Knowledge is socially constructed, imperfect, and provisional and consists of objectively verifiable facts and subjective opinions and interpretations. The merits of knowledge claims can be judged against alternative claims on the basis of the quality of the arguments and evidence.

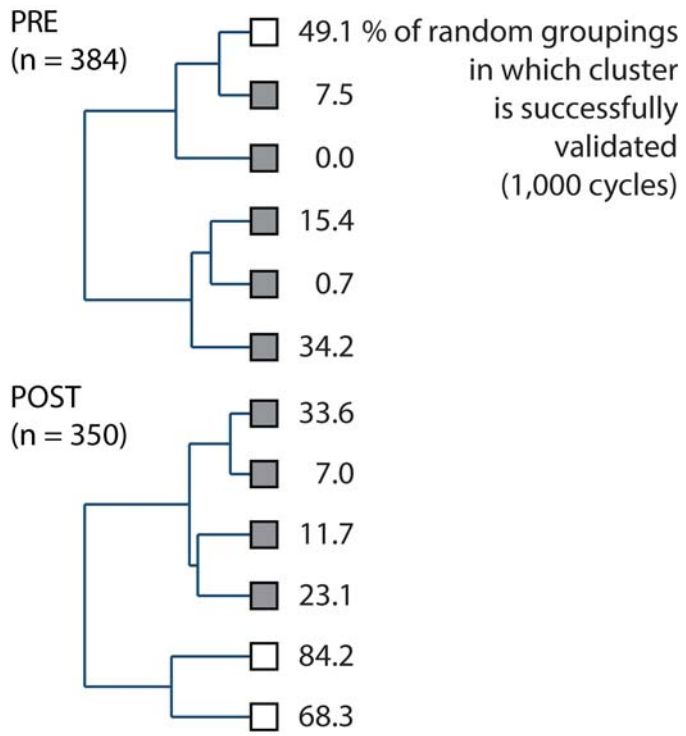

TABLE S1: Correlations among students' pre-coursepersonal dimensions  
(n = 384)<sup>a</sup>

|                           | Mastery                | Writing<br>SE              | Science<br>SE         | Cert. &<br>Simp.           | Auth. as<br>Source |
|---------------------------|------------------------|----------------------------|-----------------------|----------------------------|--------------------|
| Mastery<br>Motivation     | 1                      |                            |                       |                            |                    |
| Writing<br>Self-Efficacy  | 0.079<br><i>0.124</i>  | 1                          |                       |                            |                    |
| Science<br>Self-Efficacy  | 0.087<br><i>0.090</i>  | 0.714<br><i>&lt;0.0001</i> | 1                     |                            |                    |
| Certainty &<br>Simplicity | 0.179<br><i>0.0004</i> | 0.135<br><i>0.008</i>      | 0.124<br><i>0.015</i> | 1                          |                    |
| Authority as<br>Source    | 0.163<br><i>0.001</i>  | 0.095<br><i>0.062</i>      | 0.107<br><i>0.037</i> | 0.453<br><i>&lt;0.0001</i> | 1                  |

<sup>a</sup>In each cell, the top number is the correlation and the bottom, italicized number is the associated *p*-value.

TABLE S2: Correlations among students' post-coursepersonal dimensions  
(n = 350)<sup>a</sup>

|                           | Mastery                | Writing<br>SE              | Science<br>SE          | Cert. &<br>Simp.           | Auth. as<br>Source |
|---------------------------|------------------------|----------------------------|------------------------|----------------------------|--------------------|
| Mastery<br>Motivation     | 1                      |                            |                        |                            |                    |
| Writing<br>Self-Efficacy  | 0.167<br><i>0.002</i>  | 1                          |                        |                            |                    |
| Science<br>Self-Efficacy  | 0.203<br><i>0.0001</i> | 0.743<br><i>&lt;0.0001</i> | 1                      |                            |                    |
| Certainty &<br>Simplicity | 0.097<br><i>0.071</i>  | 0.189<br><i>0.0004</i>     | 0.195<br><i>0.0003</i> | 1                          |                    |
| Authority as<br>Source    | 0.103<br><i>0.055</i>  | 0.098<br><i>0.066</i>      | 0.109<br><i>0.041</i>  | 0.553<br><i>&lt;0.0001</i> | 1                  |

<sup>a</sup>In each cell, the top number is the correlation and the bottom, italicized number is the associated *p*-value.



TABLE S3: Correlations between students' pre- and post-course personal dimensions (n = 314)<sup>a</sup>

| PRE                    | Mastery                | Writing SE                 | Science SE                 | Cert. & Simp.              | Auth. as Source            |
|------------------------|------------------------|----------------------------|----------------------------|----------------------------|----------------------------|
| POST                   |                        |                            |                            |                            |                            |
| Mastery                | 0.596                  | 0.031                      | 0.104                      | 0.087                      | 0.050                      |
| Motivation             | <i>&lt;0.0001</i>      | <i>0.582</i>               | <i>0.066</i>               | <i>0.123</i>               | <i>0.381</i>               |
| Writing Self-Efficacy  | 0.196<br><i>0.0005</i> | 0.460<br><i>&lt;0.0001</i> | 0.340<br><i>&lt;0.0001</i> | 0.185<br><i>0.001</i>      | 0.111<br><i>0.050</i>      |
| Science Self-Efficacy  | 0.155<br><i>0.006</i>  | 0.365<br><i>&lt;0.0001</i> | 0.496<br><i>&lt;0.0001</i> | 0.144<br><i>0.011</i>      | 0.109<br><i>0.053</i>      |
| Certainty & Simplicity | 0.144<br><i>0.011</i>  | 0.119<br><i>0.035</i>      | 0.092<br><i>0.102</i>      | 0.601<br><i>&lt;0.0001</i> | 0.395<br><i>&lt;0.0001</i> |
| Authority as Source    | 0.176<br><i>0.002</i>  | 0.071<br><i>0.208</i>      | 0.048<br><i>0.396</i>      | 0.358<br><i>&lt;0.0001</i> | 0.565<br><i>&lt;0.0001</i> |

<sup>a</sup>In each cell, the top number is the correlation and the bottom, italicized number is the associated *p*-value.

TABLE S4: Correlations among changes in students' personal dimensions, pre to post (n = 314)<sup>a</sup>

|                          | Mastery               | Writing<br>SE              | Science<br>SE         | Cert. &<br>Simp.           | Auth. as<br>Source |
|--------------------------|-----------------------|----------------------------|-----------------------|----------------------------|--------------------|
| Mastery<br>Motivation    | 1                     |                            |                       |                            |                    |
| Writing<br>Self-Efficacy | 0.062<br><i>0.271</i> | 1                          |                       |                            |                    |
| Science<br>Self-Efficacy | 0.048<br><i>0.393</i> | 0.702<br><i>&lt;0.0001</i> | 1                     |                            |                    |
| Certainty<br>&Simplicity | 0.023<br><i>0.683</i> | 0.052<br><i>0.357</i>      | 0.097<br><i>0.086</i> | 1                          |                    |
| Authority as<br>Source   | 0.002<br><i>0.971</i> | 0.076<br><i>0.182</i>      | 0.085<br><i>0.134</i> | 0.352<br><i>&lt;0.0001</i> | 1                  |

<sup>a</sup>In each cell, the top number is the correlation and the bottom, italicized number is the associated *p*-value.
